# Supplementary material
Source: ML conference proceedings conference paper supplement (https://openaccess.thecvf.com/content/cvpr_2015/html/Roth_Unconstrained_3D_Face_2015_CVPR_paper.html)
Supplement: Supplementary file 2 [file Roth_Unconstrained_3D_Face_2015_CVPR_supplemental.zip]

Archive with 6 entries (5 files):
- 434_Supplemental/
- 434_Supplemental/cvpr434_sup.pdf
- 434_Supplemental/Hanks.mp4.avi
- 434_Supplemental/Personal.mp4.avi
- 434_Supplemental/README.txt
- 434_Supplemental/Williams.mp4.avi
