# Supplementary material
Source: ML conference proceedings conference paper supplement (https://openaccess.thecvf.com/content/cvpr_2015/html/Roth_Unconstrained_3D_Face_2015_CVPR_paper.html)
Supplement: Supplementary file 2 [file Roth_Unconstrained_3D_Face_2015_CVPR_supplemental.zip › 434_Supplemental/README.txt]

The videos are prepared using MP4 codec (Compressed MPEG-4 file with H.264
encoding), which can be downloaded from:

http://www.softsea.com/download/H-264-Encoder.html
or
http://www.divx.com/en/software/technologies/h264
